# Supplementary material
Source: publisher site journal article supplement (https://www.dovepress.com/article/213690)
Supplement: Supplementary file 1 [file get_supplementary_file.php]

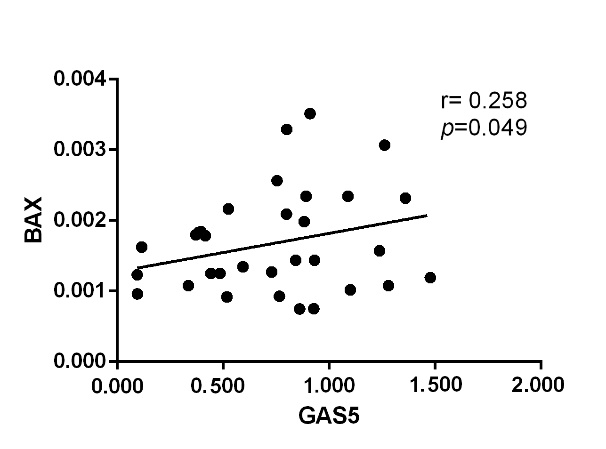

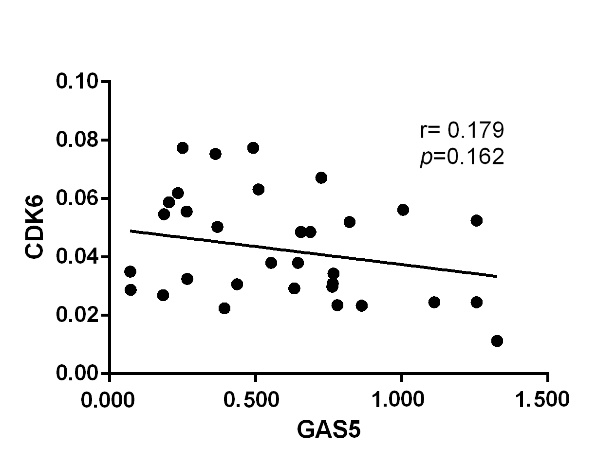


B

A

Figure S1. Correlation between GAS5 and BAX/CDK6. Relative expression of GAS5, BAX and CDK6 were detected in LSCC tissues (n=32). Correlation analysis between GAS5 and BAX（A）and correlation between GAS5 and CDK6 (B) were performed respectively.
